# Supplementary material for: Stress during Pregnancy and Offspring Pediatric Disease: A National Cohort Study
Source: PubMed Central journal article supplement (PMC3226491; doi:10.1289/ehp.1003253), 2011-07-21
Supplement: ehp.1003253.s001.pdf [file ehp.1003253.s001.pdf]

# Supplemental Material

**Stress during pregnancy and offspring pediatric disease:**

**A national cohort study**

**(Tegethoff, Greene, Olsen, Schaffner, Meinlschmidt)**

## **Table of Contents:**

|                                                                                                                             |    |
|-----------------------------------------------------------------------------------------------------------------------------|----|
| Supplemental Material Additional Methods 1: Information on scale validation.....                                            | 2  |
| Supplemental Material Table 1: Descriptives of diagnostic categories in study cohort (N = 66203).....                       | 3  |
| Supplemental Material Table 2: Sample characteristics according to stress during pregnancy.....                             | 6  |
| Supplemental Material Table 3: Unadjusted Regression Models of Offspring Diseases Predicted by Stress During Pregnancy..... | 8  |
| Supplemental Material Figure 1: Flowchart of study participants.....                                                        | 10 |
| Supplemental Material Figure 2: Cumulative Lifetime Incidences of Offspring Disease by Stress During Pregnancy.....         | 11 |
| Supplemental Material References.....                                                                                       | 15 |

## Supplemental Material Additional Methods 1: Information on scale validation

To prevent somatic confounding due to physical conditions during pregnancy, we only included items related to emotional symptoms, but none related to somatic symptoms. We validated the scale according to several types of validity (Bland and Altman 2002). Internal consistency among items was satisfactory (Cronbach's alpha = 0.75). Construct validity was determined using two external validations, demonstrating that the emotional stress scale clearly distinguished between pregnant women (i) suffering versus not suffering from a mental disorder during pregnancy (two-sample t test with equal variances:  $t_{1,63385} = -45.64$ ;  $P < 0.001$ ; mean emotional stress score (95% confidence interval) in sufferers and non-sufferers: 6.97 (6.68–7.26) and 2.72 (2.70–2.74), respectively), and (ii) having versus not having consulted a psychologist/psychiatrist in the past ( $t_{1,63799} = -53.08$ ;  $P < 0.001$ ; mean emotional stress score (95% CI) in consulters and non-consulters: 4.73 (4.63–4.83) and 2.64 (2.62–2.66), respectively). Moreover, we tested the scale's relationship with the Symptom Check List-90 in a separate sample of pregnant women ( $N = 64$ ), relating the selected items with the Symptom Check List-90 global severity index (Spearman-Rho correlation:  $r = 0.917$ ;  $P < 0.001$ ). We examined construct validity by testing the inventory's relationship with a standard measure of daily hassles (Kanner et al. 1981) in a separate sample of pregnant women ( $N = 65$ ), relating nine comparable items with the total score (Spearman-Rho correlation:  $r = 0.899$ ;  $P < 0.001$ ).

**Supplemental Material Table 1. Descriptives of Diagnostic Categories in Study Cohort (N = 66203).**

| ICD-10 category No. (ICD-10 codes) | Title                                                                                                | No. of children with a diagnosis | Age (in years) at initial diagnosis [median (range)] | Most frequent initial diagnoses <sup>a</sup> within diagnostic category                                                                                                                                                                                                                                                                                                                                                                                                                  |
|------------------------------------|------------------------------------------------------------------------------------------------------|----------------------------------|------------------------------------------------------|------------------------------------------------------------------------------------------------------------------------------------------------------------------------------------------------------------------------------------------------------------------------------------------------------------------------------------------------------------------------------------------------------------------------------------------------------------------------------------------|
| 1<br>(A00-B99)                     | Certain infectious and parasitic diseases                                                            | 6674                             | 1.3 (0-8.3)                                          | Viral infection, unspecified (N = 2711)<br>Diarrhoea and gastroenteritis of presumed infectious origin (N = 1709)<br>Viral intestinal infection unspecified (N = 726)<br>Varicella without complication (N = 148)<br>Septicaemia, unspecified (N = 80)                                                                                                                                                                                                                                   |
| 2<br>(C00-D48)                     | Neoplasms                                                                                            | 711                              | 1.6 (0-8.2)                                          | Haemangioma, any site (N = 211)<br>Benign neoplasms of skin, unspecified (N = 28)<br>Benign neoplasms of skin (skin of eyelid, including canthus) (N = 23)<br>Benign neoplasms of connective and other soft tissue of head, face and neck (N = 21)<br>Acute lymphoblastic leukaemia (N = 19)                                                                                                                                                                                             |
| 3<br>(D50-D89)                     | Diseases of the blood and blood-forming organs and certain disorders involving the immune mechanisms | 512                              | 2.3 (0-8.1)                                          | Allergic purpura (N = 149)<br>Idiopathic thrombocytopenic purpura (N = 55)<br>Anaemia, unspecified (N = 45)<br>Other specified immunodeficiencies (N = 22)<br>Immunodeficiency, unspecified (N = 20)                                                                                                                                                                                                                                                                                     |
| 4<br>(E00-E90)                     | Endocrine, nutritional and metabolic disorders                                                       | 1178                             | 1.7 (0-8.3)                                          | Volume depletion (N = 559)<br>Acidosis (N = 141)<br>Hypoglycaemia, unspecified (N = 50)<br>Short stature, not elsewhere classified (N = 45)<br>Insulin-dependent diabetes mellitus, without complications (N = 40)                                                                                                                                                                                                                                                                       |
| 5<br>(F00-F99)                     | Mental and behavioral disorders                                                                      | 543                              | 3.7 (0-8.2)                                          | < 2.5 years<br>Feeding disorder of infancy and childhood (N = 54)<br>Eating disorder, unspecified (N = 21)<br>Unspecified mental retardation, without mention of impairment of behaviour (N = 20)<br>Adjustment disorders (N = 17)<br>Other eating disorders (N = 13)<br>> 2.5 years<br>Nonorganic encopresis (N = 51)<br>Mixed specific developmental disorders (N = 24)<br>Disturbance of activity and attention (N = 19)<br>Nonorganic enuresis (N = 18)<br>Childhood autism (N = 15) |

**Supplemental Material Table 1. Descriptives of Diagnostic Categories in Study Cohort (N = 66203) (cont).**

|                 |                                         |       |             |                                                                                                                                                                                                                                                                                                                                                                                                                                                                                                                                          |
|-----------------|-----------------------------------------|-------|-------------|------------------------------------------------------------------------------------------------------------------------------------------------------------------------------------------------------------------------------------------------------------------------------------------------------------------------------------------------------------------------------------------------------------------------------------------------------------------------------------------------------------------------------------------|
| 6<br>(G00-G99)  | Diseases of the nervous system          | 1268  | 2.2 (0-8.3) | Epilepsy, unspecified (N = 350)<br>Sleep apnoea (N = 157)<br>Hydrocephalus, unspecified (N = 45)<br>Cerebral palsy, unspecified (N = 44)<br>Bacterial meningitis, unspecified (N = 39)                                                                                                                                                                                                                                                                                                                                                   |
| 7<br>(H00-H59)  | Diseases of the eye and adnexa          | 1451  | 2.2 (0-8.2) | <b>&lt; 4.5 years</b><br>Acute conjunctivitis, unspecified (N = 219)<br>Stenosis and insufficiency of lacrimal passages (N = 121)<br>Convergent concomitant strabismus (N = 90)<br>Hypermetropia (N = 68)<br>Chalazion (N = 54)<br><b>&gt; 4.5 years</b><br>Hypermetropia (N = 27)<br>Convergent concomitant strabismus (N = 26)<br>Acute conjunctivitis, unspecified (N = 22)<br>Chalazion (N = 19)<br>Acute atopic conjunctivitis (N = 16)                                                                                             |
| 8<br>(H60-H95)  | Diseases of the ear and mastoid process | 4344  | 1.4 (0-8.5) | Acute suppurative otitis media (N = 1221)<br>Hearing loss, unspecified (N = 570)<br>Chronic mucoid otitis media (N = 515)<br>Otitis media, unspecified (N = 393)<br>Nonsuppurative otitis media, unspecified (N = 362)                                                                                                                                                                                                                                                                                                                   |
| 9<br>(I00-I99)  | Diseases of the circulatory system      | 362   | 2.1 (0-8.1) | <b>&lt; 3 years</b><br>Heart disease, unspecified (N = 16)<br>Nonspecific lymphadenitis, unspecified (N = 16)<br>Chronic lymphadenitis, except mesenteric (N = 15)<br>Supraventricular tachycardia (N = 14)<br>Atrial premature depolarization (N = 10)<br><b>&gt; 3 years</b><br>Nonspecific lymphadenitis, unspecified (N = 21)<br>Chronic lymphadenitis, except mesenteric (N = 16)<br>Unspecified haemorrhoids without complication (N = 14)<br>Nonspecific mesenteric lymphadenitis (N = 6)<br>Supraventricular tachycardia (N = 6) |
| 10<br>(J00-J99) | Diseases of the respiratory system      | 12442 | 1.4 (0-8.4) | Asthma, unspecified (N = 1873)<br>Acute obstructive laryngitis [croup] (N = 1574)<br>Pneumonia, unspecified (N = 1299)<br>Acute bronchitis, unspecified (N = 1152)<br>Acute nasopharyngitis [common cold] (N = 779)                                                                                                                                                                                                                                                                                                                      |

**Supplemental Material Table 1. Descriptives of Diagnostic Categories in Study Cohort (N = 66203) (cont).**

|                              |                                                                      |       |              |                                                                                                                                                                                                                                                                                                                  |
|------------------------------|----------------------------------------------------------------------|-------|--------------|------------------------------------------------------------------------------------------------------------------------------------------------------------------------------------------------------------------------------------------------------------------------------------------------------------------|
| 11<br>(K00-K93)              | Diseases of the digestive system                                     | 4032  | 2.1 (0-8.8)  | Unilateral or unspecified inguinal hernia, without obstruction or gangrene (N = 1015)<br>Constipation (N = 741)<br>Umbilical hernia without obstruction or gangrene (N = 251)<br>Allergic and dietetic gastroenteritis and colitis (N = 175)<br>Gastro-oesophageal reflux disease without oesophagitis (N = 106) |
| 12<br>(L00-L99)              | Diseases of the skin and subcutaneous tissue                         | 2500  | 2.1 (0-8.3)  | Atopic dermatitis, unspecified (N = 243)<br>Besnier's prurigo (N = 200)<br>Staphylococcal scalded skin syndrome (N = 165)<br>Impetigo (N = 155)<br>Acute lymphadenitis of face, head and neck (N = 155)                                                                                                          |
| 13<br>(M00-M99)              | Diseases of the musculoskeletal system and connective tissue         | 3107  | 2.6 (0-8.3)  | Disorder of bone, unspecified (N = 356)<br>Pain in limb (N = 345)<br>Residual foreign body in soft tissue (N = 318)<br>Reactive arthropathy, unspecified (N = 288)<br>Torticollis (N = 147)                                                                                                                      |
| 14<br>(N00-N99)              | Diseases of the genitourinary system                                 | 2243  | 2.7 (0-8.3)  | Urinary tract infection, site not specified (N = 337)<br>Redundant prepuce, phimosis and paraphimosis (N = 314)<br>Acute tubulo-interstitial nephritis (N = 274)<br>Hydrocele, unspecified (N = 261)<br>Acute cystitis (N = 175)                                                                                 |
| 15 <sup>b</sup><br>(O00-O99) | Pregnancy, childbirth and the puerperium                             |       |              |                                                                                                                                                                                                                                                                                                                  |
| 16<br>(P00-P96)              | Certain conditions originating in the perinatal period               | 12590 | Not relevant | Post-term infant, not heavy for gestational age (N = 1522)<br>Other heavy for gestational age infants (N = 1453)<br>Neonatal jaundice, unspecified (N = 1446)<br>Other preterm infants (N = 983)<br>Mild and moderate birth asphyxia (N = 861)                                                                   |
| 17<br>(Q00-Q99)              | Congenital malformations, deformations and chromosomal abnormalities | 5534  | Not relevant | Undescended testicle, unilateral (N = 409)<br>Congenital malformation of heart, unspecified (N = 388)<br>Congenital dislocation of hip, unilateral (N = 295)<br>Other congenital deformities of hip (N = 210)<br>Undescended testicle, bilateral (N = 167)                                                       |
| „Any disease“                | Any disease of the ICD-10 categories                                 | 34665 | 0.4 (0-8.5)  |                                                                                                                                                                                                                                                                                                                  |

ICD-10 = International Classification of Diseases, 10th revision (Danish National Board of Health 1993).

<sup>a</sup> Information on the children's diagnoses were obtained from the database-linked Danish National Hospital Register, which contains information on all ICD-10 diagnoses of inpatients and outpatients in Danish hospitals. In each diagnostic category, we used the initial diagnosis.

<sup>b</sup> Not relevant for children.

**Supplemental Material Table 2. Sample Characteristics According to Stress During Pregnancy.**

|                                                                       | All mother-child pairs                       | Maternal life stress during pregnancy <sup>a</sup> |            |             |       | Maternal emotional stress during pregnancy <sup>a</sup> |            |             |       |
|-----------------------------------------------------------------------|----------------------------------------------|----------------------------------------------------|------------|-------------|-------|---------------------------------------------------------|------------|-------------|-------|
|                                                                       |                                              | Low                                                | Low-medium | Medium-high | High  | Low                                                     | Low-medium | Medium-high | High  |
| Total study population (N)                                            | 66203                                        | 19793                                              | 14488      | 20377       | 11545 | 25083                                                   | 11432      | 15971       | 13717 |
|                                                                       | <i>Discrete variables: n (%<sup>b</sup>)</i> | <i>Discrete variables: %<sup>b</sup></i>           |            |             |       |                                                         |            |             |       |
| <b>Maternal age (years)</b>                                           |                                              |                                                    |            |             |       |                                                         |            |             |       |
| < 27                                                                  | 13614 (20.6)                                 | 20.0                                               | 19.6       | 20.6        | 22.7  | 17.7                                                    | 20.8       | 21.8        | 24.2  |
| 27-29                                                                 | 17880 (27.0)                                 | 29.1                                               | 27.6       | 26.1        | 24.2  | 28.4                                                    | 27.4       | 26.5        | 24.8  |
| 30-32                                                                 | 16517 (25.0)                                 | 24.9                                               | 25.7       | 25.2        | 23.7  | 26.0                                                    | 25.1       | 24.7        | 23.2  |
| > 32                                                                  | 18192 (27.5)                                 | 26.0                                               | 27.1       | 28.1        | 29.4  | 27.9                                                    | 26.8       | 27.0        | 27.9  |
| <b>Parity</b>                                                         |                                              |                                                    |            |             |       |                                                         |            |             |       |
| Primiparous                                                           | 29574 (44.7)                                 | 51.9                                               | 46.2       | 41.0        | 36.8  | 46.9                                                    | 45.0       | 44.4        | 40.6  |
| Multiparous                                                           | 34240 (51.7)                                 | 44.6                                               | 50.4       | 55.5        | 58.9  | 49.8                                                    | 51.5       | 51.9        | 55.3  |
| Unknown                                                               | 2389 (3.6)                                   | 3.4                                                | 3.4        | 3.5         | 4.3   | 3.3                                                     | 3.4        | 3.7         | 4.2   |
| <b>General maternal health</b>                                        |                                              |                                                    |            |             |       |                                                         |            |             |       |
| Very good                                                             | 33454 (50.5)                                 | 60.1                                               | 52.7       | 46.4        | 38.7  | 58.3                                                    | 51.7       | 46.7        | 39.8  |
| Average                                                               | 28114 (42.5)                                 | 35.6                                               | 41.8       | 46.2        | 48.6  | 36.6                                                    | 42.0       | 46.0        | 49.5  |
| Bad                                                                   | 2263 (3.4)                                   | 1.0                                                | 2.1        | 3.8         | 8.5   | 1.8                                                     | 2.9        | 3.6         | 6.5   |
| Unknown                                                               | 2372 (3.6)                                   | 3.4                                                | 3.4        | 3.5         | 4.2   | 3.3                                                     | 3.4        | 3.7         | 4.2   |
| <b>Socioeconomic status</b>                                           |                                              |                                                    |            |             |       |                                                         |            |             |       |
| High                                                                  | 32627 (49.3)                                 | 49.6                                               | 50.5       | 49.9        | 46.3  | 53.6                                                    | 49.6       | 48.1        | 42.6  |
| Medium                                                                | 23299 (35.2)                                 | 36.9                                               | 35.7       | 34.1        | 33.6  | 33.8                                                    | 35.4       | 35.6        | 37.1  |
| Low                                                                   | 5220 (7.9)                                   | 6.8                                                | 6.9        | 8.3         | 10.2  | 6.1                                                     | 7.5        | 8.5         | 10.9  |
| Unknown                                                               | 5057 (7.6)                                   | 6.7                                                | 7.0        | 7.7         | 9.9   | 6.6                                                     | 7.5        | 7.9         | 9.4   |
| <b>Infant sex</b>                                                     |                                              |                                                    |            |             |       |                                                         |            |             |       |
| Male                                                                  | 33779 (51.0)                                 | 51.8                                               | 50.8       | 50.5        | 51.0  | 51.7                                                    | 50.6       | 50.7        | 50.5  |
| Female                                                                | 32424 (49.0)                                 | 48.2                                               | 49.3       | 49.5        | 49.1  | 48.3                                                    | 49.4       | 49.3        | 49.5  |
| <b>Hypertension during pregnancy</b>                                  |                                              |                                                    |            |             |       |                                                         |            |             |       |
| Yes                                                                   | 8824 (13.3)                                  | 11.4                                               | 13.1       | 14.0        | 15.8  | 11.6                                                    | 13.2       | 14.1        | 15.8  |
| No                                                                    | 57192 (86.4)                                 | 88.4                                               | 86.6       | 85.7        | 83.9  | 88.2                                                    | 86.6       | 85.6        | 83.8  |
| Unknown                                                               | 187 (0.3)                                    | 0.2                                                | 0.3        | 0.3         | 0.4   | 0.2                                                     | 0.3        | 0.3         | 0.4   |
| <b>Gestational diabetes</b>                                           |                                              |                                                    |            |             |       |                                                         |            |             |       |
| Yes                                                                   | 1632 (2.5)                                   | 1.8                                                | 2.3        | 2.8         | 3.2   | 2.1                                                     | 2.4        | 2.8         | 2.9   |
| No                                                                    | 64225 (97.0)                                 | 97.9                                               | 97.2       | 96.6        | 95.9  | 97.6                                                    | 97.0       | 96.7        | 96.3  |
| Unknown                                                               | 346 (0.5)                                    | 0.3                                                | 0.5        | 0.6         | 0.9   | 0.4                                                     | 0.6        | 0.5         | 0.8   |
| <b>Smoking</b>                                                        |                                              |                                                    |            |             |       |                                                         |            |             |       |
| Yes                                                                   | 17020 (25.7)                                 | 21.1                                               | 23.5       | 27.0        | 34.2  | 19.7                                                    | 23.7       | 28.0        | 35.6  |
| No                                                                    | 47255 (71.4)                                 | 76.0                                               | 73.6       | 70.2        | 62.8  | 77.4                                                    | 73.6       | 69.0        | 61.4  |
| Unknown                                                               | 1928 (2.9)                                   | 2.9                                                | 2.9        | 2.9         | 3.1   | 2.9                                                     | 2.8        | 3.0         | 3.0   |
| <b>Maternal life stress during pregnancy<sup>a</sup> (score)</b>      |                                              |                                                    |            |             |       |                                                         |            |             |       |
| Low (0)                                                               | 19793 (29.9)                                 | 100.0                                              | 0.0        | 0.0         | 0.0   | 47.2                                                    | 31.0       | 20.2        | 8.7   |
| Low-medium (>0-≤1)                                                    | 14488 (21.9)                                 | 0.0                                                | 100.0      | 0.0         | 0.0   | 24.6                                                    | 25.1       | 22.7        | 13.4  |
| Medium-high (>1-≤3)                                                   | 20377 (30.8)                                 | 0.0                                                | 0.0        | 100.0       | 0.0   | 23.0                                                    | 32.6       | 37.9        | 35.2  |
| High (>3)                                                             | 11545 (17.4)                                 | 0.0                                                | 0.0        | 0.0         | 100.0 | 5.3                                                     | 11.2       | 19.3        | 42.8  |
| <b>Maternal emotional stress during pregnancy<sup>a</sup> (score)</b> |                                              |                                                    |            |             |       |                                                         |            |             |       |
| Low (≤1)                                                              | 25083 (37.9)                                 | 59.8                                               | 42.5       | 28.4        | 11.4  | 100.0                                                   | 0.0        | 0.0         | 0.0   |
| Low-medium (>1-≤2)                                                    | 11432 (17.3)                                 | 17.9                                               | 19.8       | 18.3        | 11.1  | 0.0                                                     | 100.0      | 0.0         | 0.0   |
| Medium-high (>2-≤4)                                                   | 15971 (24.1)                                 | 16.3                                               | 25.0       | 29.7        | 26.7  | 0.0                                                     | 0.0        | 100.0       | 0.0   |
| High (>4)                                                             | 13717 (20.7)                                 | 6.0                                                | 12.7       | 23.7        | 50.8  | 0.0                                                     | 0.0        | 0.0         | 100.0 |

**Supplemental Material Table 2. Sample Characteristics According to Stress During Pregnancy (cont).**

| <b>Maternal life stress after pregnancy<sup>a</sup> (score)</b>      |              |      |      |      |      |      |      |      |      |
|----------------------------------------------------------------------|--------------|------|------|------|------|------|------|------|------|
| Low (0)                                                              | 32296 (48.8) | 69.0 | 53.3 | 41.2 | 21.8 | 62.8 | 51.4 | 42.9 | 29.1 |
| Low-medium (>0-<br>≤1)                                               | 13829 (20.9) | 17.8 | 23.9 | 23.5 | 17.8 | 19.2 | 22.0 | 23.5 | 20.0 |
| Medium-high (>1-<br>≤2)                                              | 9725 (14.7)  | 8.9  | 13.6 | 17.9 | 20.3 | 11.0 | 14.6 | 16.8 | 19.0 |
| High (>2)                                                            | 10353 (15.6) | 4.3  | 9.2  | 17.4 | 40.1 | 7.0  | 12.0 | 17.8 | 31.9 |
| <b>Maternal emotional stress after pregnancy<sup>a</sup> (score)</b> |              |      |      |      |      |      |      |      |      |
| Low (0)                                                              | 22313 (33.7) | 46.7 | 35.6 | 28.4 | 18.4 | 52.9 | 33.2 | 22.2 | 12.5 |
| Low-medium (>0-<br>≤1)                                               | 12557 (19.0) | 20.6 | 21.1 | 18.6 | 14.2 | 21.5 | 22.4 | 19.0 | 11.4 |
| Medium-high (>1-<br>≤3)                                              | 15847 (23.9) | 20.0 | 24.5 | 26.7 | 25.2 | 17.2 | 27.8 | 30.9 | 25.1 |
| High (>3)                                                            | 15486 (23.4) | 12.8 | 18.9 | 26.3 | 42.1 | 8.5  | 16.7 | 27.9 | 51.0 |

<sup>a</sup> Stress groups were defined by cutoffs the closest possible to the quartiles of their distribution distribution.

<sup>b</sup> Percentages may not total 100 due to rounding.

### Supplemental Material Table 3. Unadjusted Regression Models of Offspring Diseases Predicted by Stress During Pregnancy.

HRs and ORs according to unadjusted model (presented in support of transparency) for the offspring having an initial diagnosis<sup>a</sup> within the respective diagnostic category (outcomes) according to maternal life stress and emotional stress during pregnancy (predictors) (N = 66203).

| ICD-10<br>Category:<br>No. Name                | No. of<br>children with<br>a diagnosis | Life stress: Unadjusted HR                                 |                                                            |                                                            | Emotional stress: Unadjusted HR                            |                                                            |                                                            |
|------------------------------------------------|----------------------------------------|------------------------------------------------------------|------------------------------------------------------------|------------------------------------------------------------|------------------------------------------------------------|------------------------------------------------------------|------------------------------------------------------------|
|                                                |                                        | Low-medium<br>vs. Low                                      | Medium-high<br>vs. Low                                     | High vs.<br>Low                                            | Low-medium<br>vs. Low                                      | Medium-high<br>vs. Low                                     | High vs.<br>Low                                            |
| 1. Infections, parasitic diseases              | 6674                                   | 1.09<br>[1.02, 1.17]                                       | 1.14<br>[1.06, 1.22]                                       | 1.37<br>[1.27, 1.48]                                       | 1.02<br>[0.94, 1.09]                                       | 1.13<br>[1.05, 1.20]                                       | 1.24<br>[1.15, 1.33]                                       |
| 2. Neoplasms                                   | 711                                    | 0.93<br>[0.75, 1.15]                                       | 1.08<br>[0.88, 1.31]                                       | 0.97<br>[0.76, 1.25]                                       | 0.97<br>[0.77, 1.21]                                       | 1.09<br>[0.89, 1.34]                                       | 1.22<br>[0.98, 1.52]                                       |
| 3. Diseases of blood, immune system            | 512                                    | 1.02<br>[0.79, 1.32]                                       | 1.05<br>[0.82, 1.34]                                       | 1.31<br>[1.00, 1.73]                                       | 1.23<br>[0.95, 1.59]                                       | 1.23<br>[0.96, 1.57]                                       | 1.25<br>[0.96, 1.62]                                       |
| 4. Endocrine, metabolic disorders              | 1178                                   | 1.02<br>[0.86, 1.21]                                       | 1.09<br>[0.94, 1.28]                                       | 1.24<br>[1.03, 1.50]                                       | 1.07<br>[0.91, 1.27]                                       | 0.95<br>[0.81, 1.11]                                       | 0.96<br>[0.81, 1.15]                                       |
| 5. Mental and behavioral disorders             | 543                                    | <2.5y: 1.52<br>>2.5y: 0.80<br>[1.01, 2.30]<br>[0.57, 1.13] | <2.5y: 1.38<br>>2.5y: 1.13<br>[0.93, 2.05]<br>[0.85, 1.51] | <2.5y: 2.18<br>>2.5y: 1.39<br>[1.45, 3.28]<br>[1.00, 1.93] | 1.23<br>[0.96, 1.58]                                       | 1.05<br>[0.83, 1.34]                                       | 1.26<br>[0.98, 1.61]                                       |
| 6. Diseases of nervous system                  | 1268                                   | 1.03<br>[0.87, 1.21]                                       | 1.10<br>[0.94, 1.28]                                       | 1.27<br>[1.06, 1.52]                                       | 0.92<br>[0.77, 1.09]                                       | 1.12<br>[0.96, 1.30]                                       | 1.12<br>[0.95, 1.32]                                       |
| 7. Diseases of eye <sup>b</sup>                | 1451                                   | <4.5y: 0.98<br>>4.5y: 1.29<br>[0.83, 1.16]<br>[0.90, 1.83] | <4.5y: 1.00<br>>4.5y: 1.62<br>[0.86, 1.16]<br>[1.18, 2.21] | <4.5y: 1.32<br>>4.5y: 1.30<br>[1.11, 1.58]<br>[0.89, 1.90] | 0.98<br>[0.84, 1.15]                                       | 1.06<br>[0.93, 1.22]                                       | 1.01<br>[0.86, 1.17]                                       |
| 8. Diseases of ear                             | 4344                                   | 1.06<br>[0.97, 1.16]                                       | 1.18<br>[1.09, 1.28]                                       | 1.45<br>[1.32, 1.60]                                       | 1.09<br>[1.00, 1.19]                                       | 1.09<br>[1.00, 1.18]                                       | 1.17<br>[1.07, 1.27]                                       |
| 9. Diseases of circulatory system <sup>b</sup> | 362                                    | 1.16<br>[0.87, 1.56]                                       | 1.06<br>[0.80, 1.41]                                       | 1.29<br>[0.93, 1.80]                                       | <3.0y: 0.91<br>>3.0y: 1.05<br>[0.62, 1.33]<br>[0.65, 1.70] | <3.0y: 0.82<br>>3.0y: 0.70<br>[0.57, 1.18]<br>[0.43, 1.14] | <3.0y: 0.82<br>>3.0y: 1.37<br>[0.55, 1.21]<br>[0.90, 2.09] |
| 10. Diseases of respiratory system             | 12442                                  | 1.06<br>[1.01, 1.12]                                       | 1.19<br>[1.13, 1.25]                                       | 1.39<br>[1.31, 1.47]                                       | 1.01<br>[0.96, 1.07]                                       | 1.03<br>[0.98, 1.08]                                       | 1.11<br>[1.05, 1.17]                                       |
| 11. Diseases of digestive system               | 4032                                   | 1.05<br>[0.96, 1.16]                                       | 1.20<br>[1.11, 1.31]                                       | 1.27<br>[1.15, 1.41]                                       | 1.03<br>[0.94, 1.13]                                       | 1.11<br>[1.02, 1.21]                                       | 1.11<br>[1.01, 1.22]                                       |
| 12. Diseases of skin                           | 2500                                   | 0.97<br>[0.86, 1.09]                                       | 1.10<br>[0.99, 1.22]                                       | 1.33<br>[1.17, 1.52]                                       | 0.99<br>[0.88, 1.11]                                       | 0.96<br>[0.86, 1.07]                                       | 1.01<br>[0.90, 1.14]                                       |
| 13. Diseases of musculoskeletal system         | 3107                                   | 1.04<br>[0.93, 1.15]                                       | 1.08<br>[0.98, 1.19]                                       | 1.19<br>[1.06, 1.34]                                       | 1.00<br>[0.90, 1.11]                                       | 0.94<br>[0.85, 1.04]                                       | 1.04<br>[0.94, 1.16]                                       |
| 14. Diseases of genitourinary system           | 2243                                   | 1.13<br>[1.00, 1.28]                                       | 1.21<br>[1.08, 1.36]                                       | 1.31<br>[1.14, 1.50]                                       | 0.97<br>[0.85, 1.10]                                       | 1.10<br>[0.99, 1.23]                                       | 1.02<br>[0.90, 1.15]                                       |
| Any                                            | 34665                                  | 1.02<br>[0.99, 1.05]                                       | 1.12<br>[1.09, 1.15]                                       | 1.19<br>[1.15, 1.23]                                       | 1.01<br>[0.98, 1.04]                                       | 1.04<br>[1.01, 1.07]                                       | 1.09<br>[1.05, 1.12]                                       |



**Supplemental Material Table 3. Unadjusted Regression Models of Offspring Diseases Predicted by Stress During Pregnancy (cont).**

| ICD-10<br>Category:<br>No. Name                | No. of<br>children with<br>a diagnosis | Life stress: Unadjusted OR |                            |                      | Emotional stress: Unadjusted OR |                            |                      |
|------------------------------------------------|----------------------------------------|----------------------------|----------------------------|----------------------|---------------------------------|----------------------------|----------------------|
|                                                |                                        | Low-<br>medium<br>vs. Low  | Medium-<br>high vs.<br>Low | High vs.<br>Low      | Low-<br>medium<br>vs. Low       | Medium-<br>high vs.<br>Low | High vs.<br>Low      |
| 16. Conditions originating in perinatal period | 12590                                  | 1.00<br>[0.95, 1.06]       | 1.07<br>[1.02, 1.13]       | 1.09<br>[1.02, 1.16] | 1.01<br>[0.96, 1.07]            | 1.03<br>[0.98, 1.09]       | 1.06<br>[1.00, 1.12] |
| 17. Malformations                              | 5534                                   | 1.02<br>[0.94, 1.10]       | 1.10<br>[1.02, 1.18]       | 1.14<br>[1.04, 1.24] | 0.99<br>[0.92, 1.08]            | 1.00<br>[0.93, 1.08]       | 1.04<br>[0.96, 1.13] |

HR = Hazard ratio, ICD-10 = International Classification of Diseases, 10th revision, OR = Odds ratio, y = years.

<sup>a</sup> Information on the children's diagnoses were obtained from the database-linked Danish National Hospital Register, which contains information on all diagnoses of inpatients and outpatients in Danish hospitals. In each diagnostic category, we used the initial diagnosis.

<sup>b</sup> Data were split at indicated times.

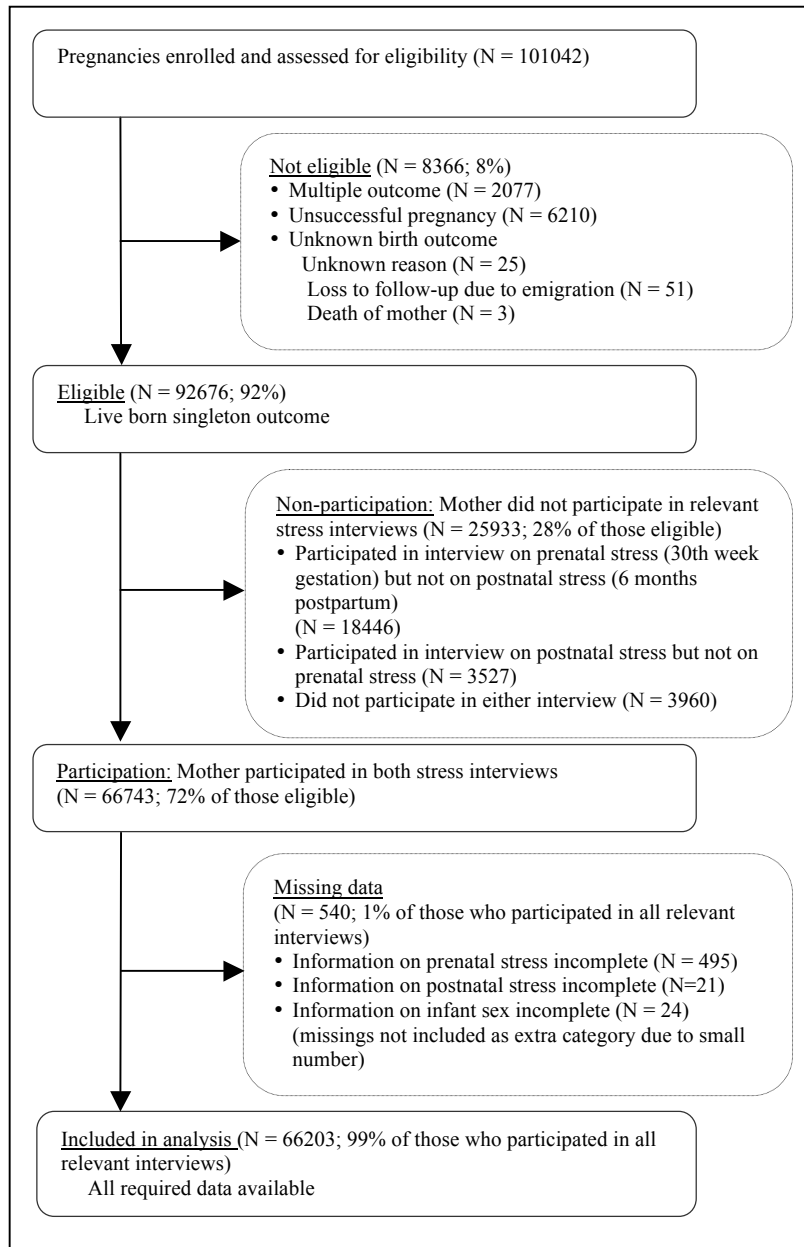

**Supplemental Material Figure 1: Flowchart of Study Participants.**

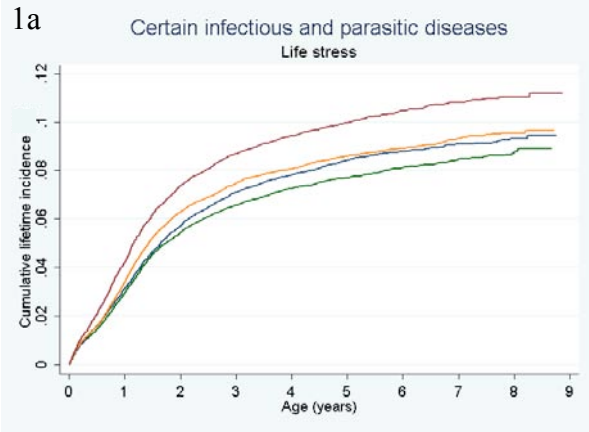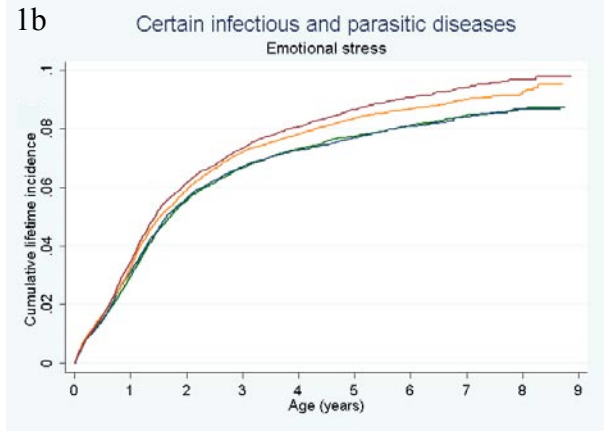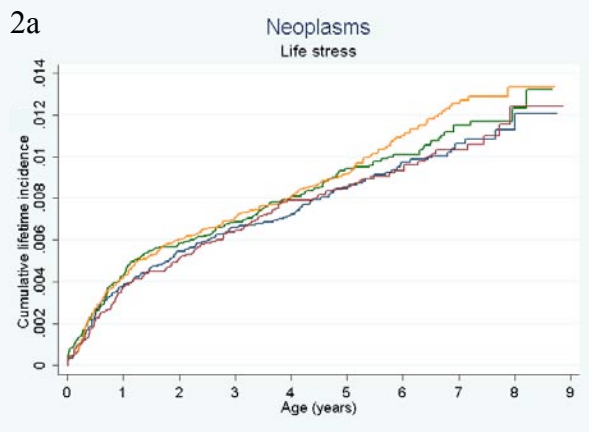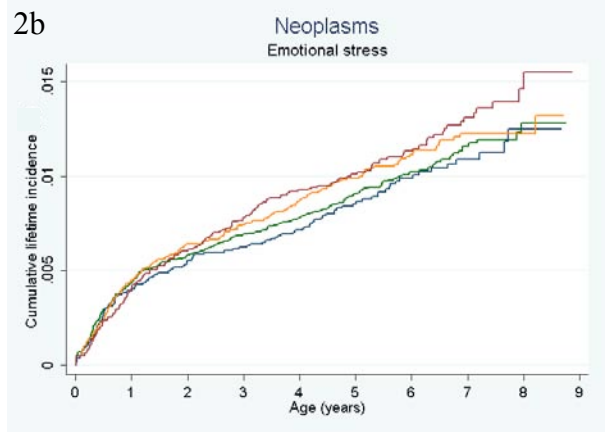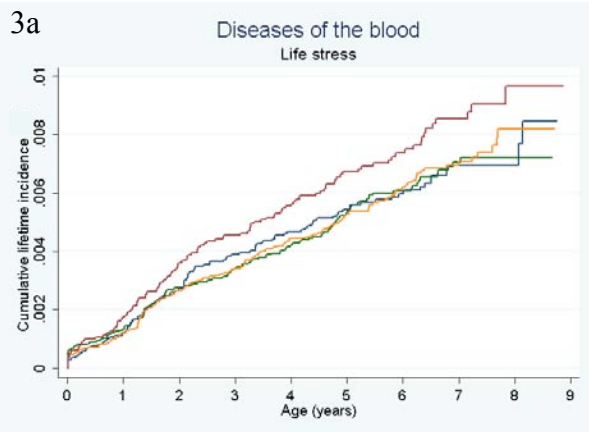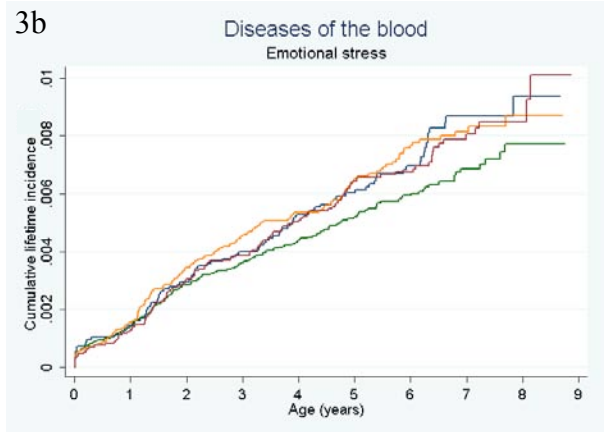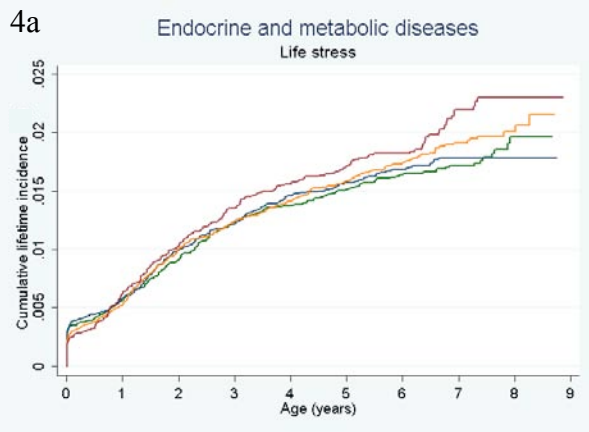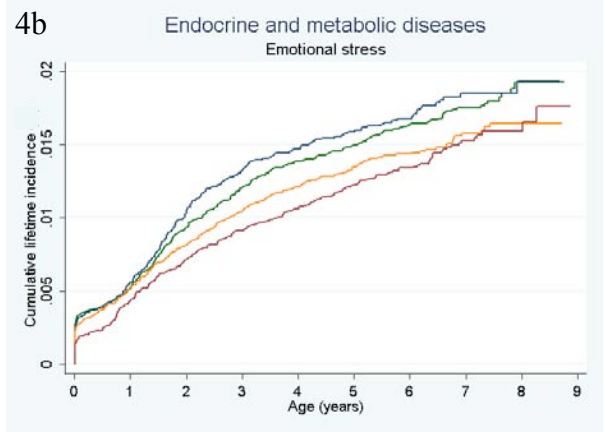

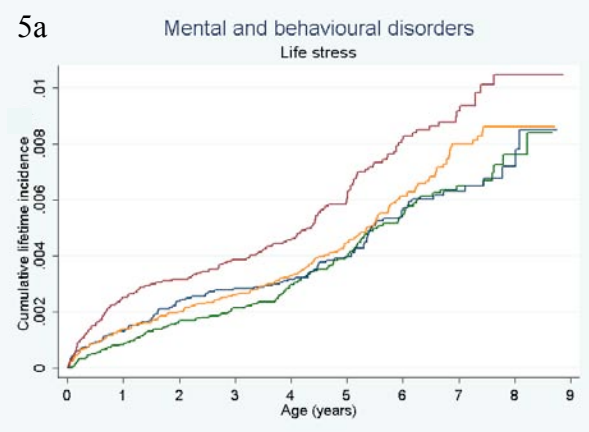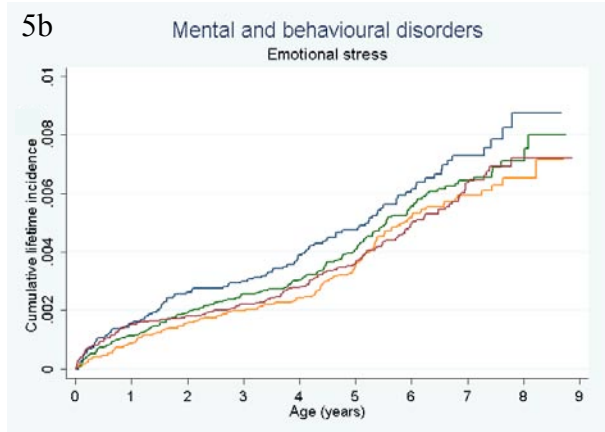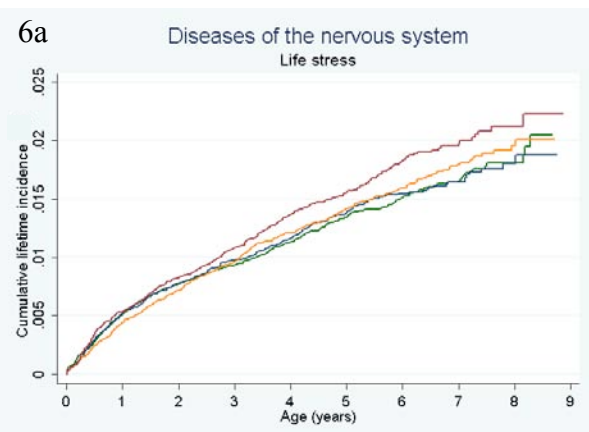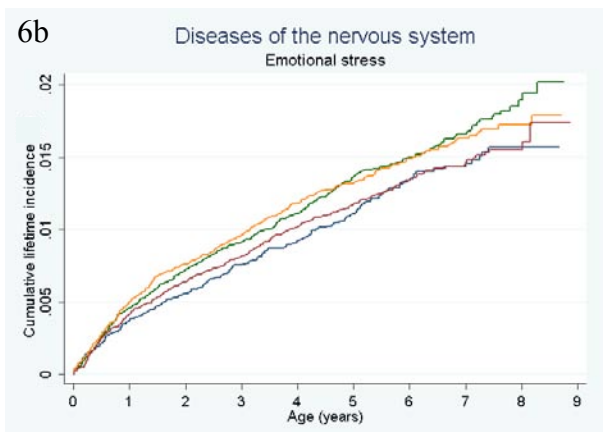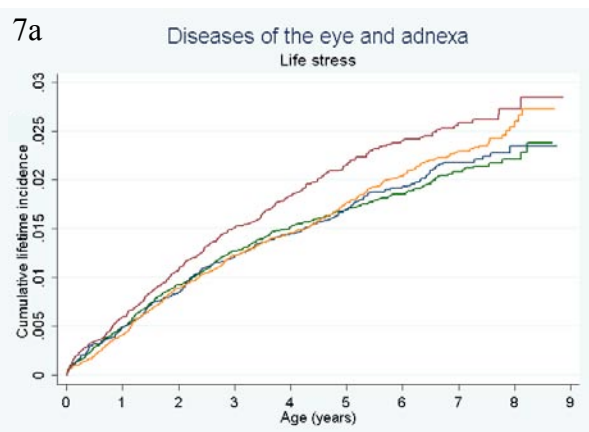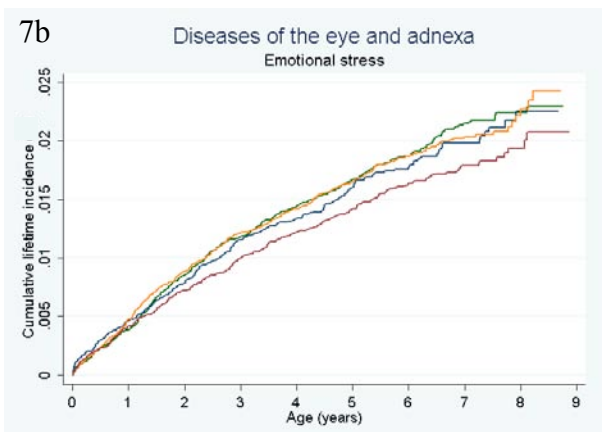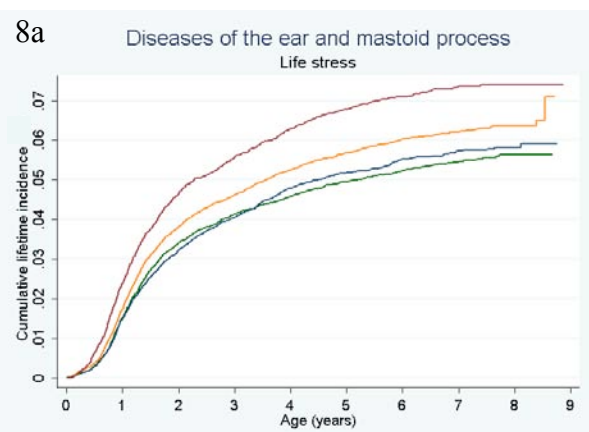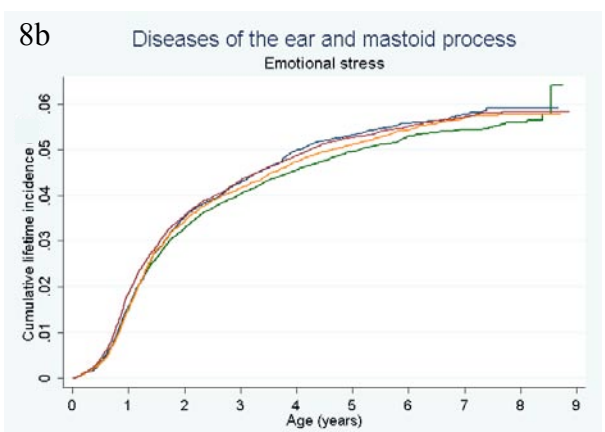

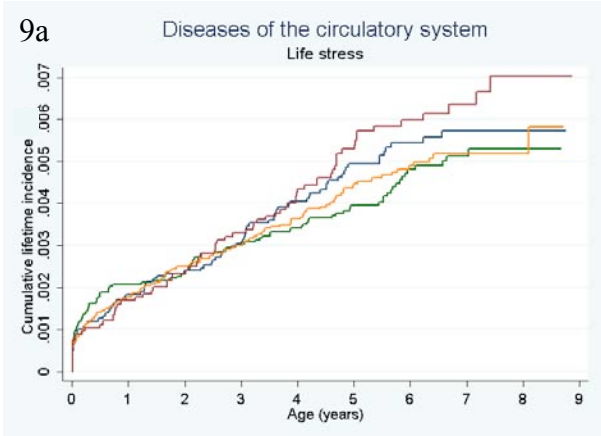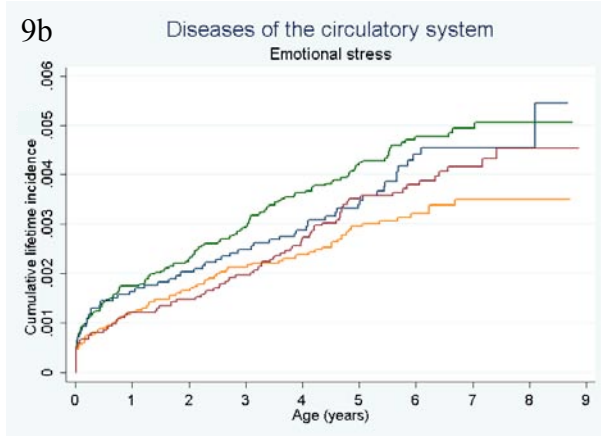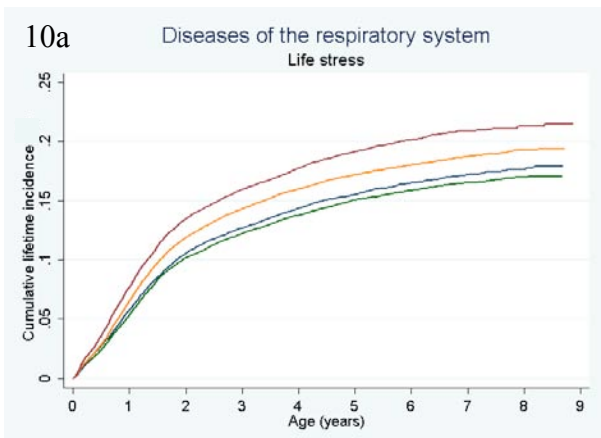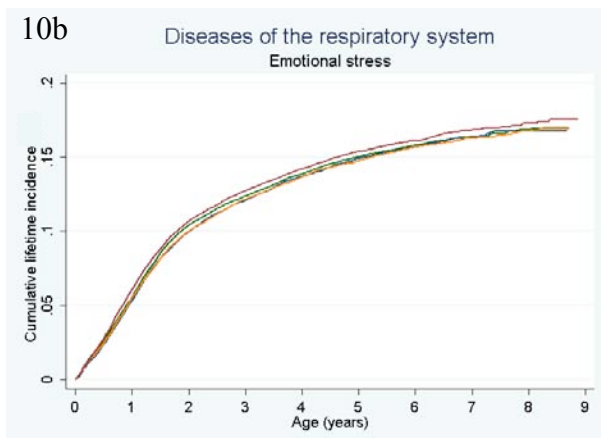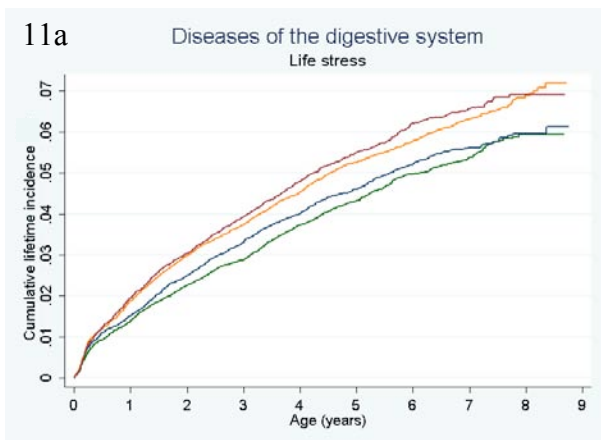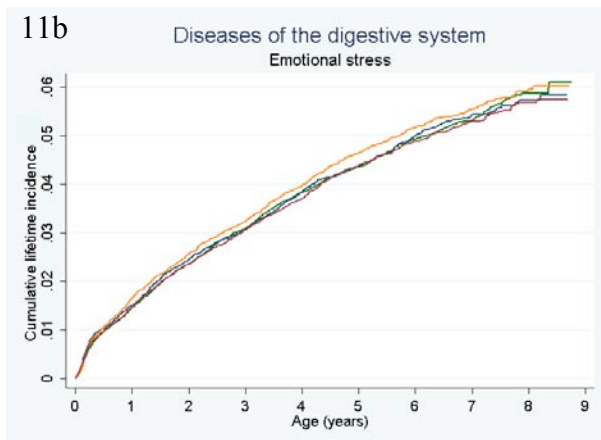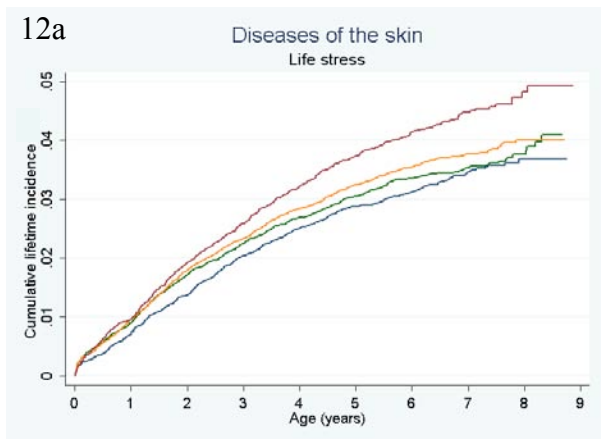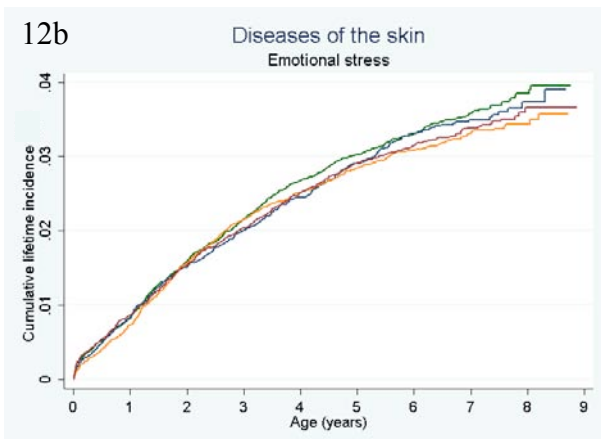

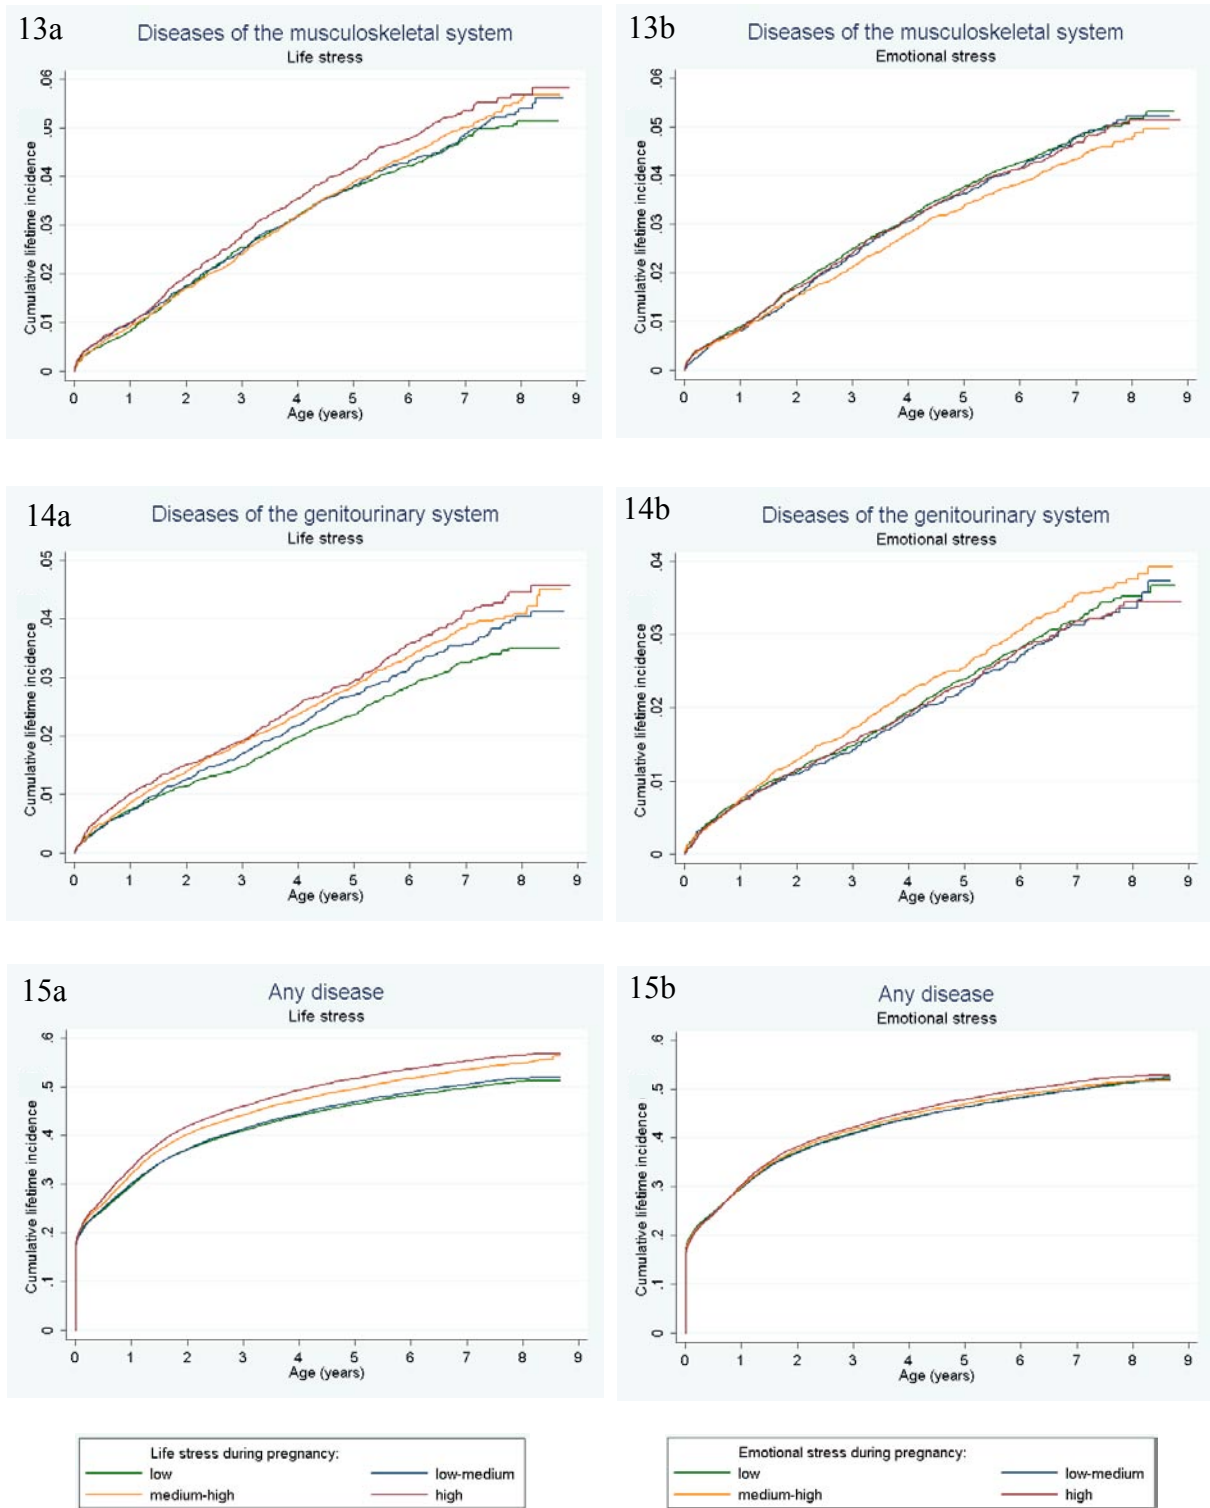

## Supplemental Material Figure 2. Cumulative Lifetime Incidences of Offspring Disease by Stress During Pregnancy.

Cumulative lifetime incidence of offspring disease in diagnostic categories according to maternal psychosocial stress during pregnancy. Cumulative lifetime incidence of certain infectious and parasitic diseases (1a, b), neoplasms (2a, b), diseases of blood (3a, b), endocrine and metabolic diseases (4a, b), mental and behavioral disorders (5a, b), diseases of the nervous system (6a, b), diseases of the eye and adnexa (7a, b), diseases of the ear and mastoid process (8a, b), diseases of the circulatory system (9a, b), diseases of the respiratory system (10a, b), diseases of the digestive system (11a, b), diseases of the skin (12a, b), diseases of the musculoskeletal system (13a, b), diseases of the genitourinary system (14a, b), and of any disease (15a, b) in the offspring, according to maternal life stress (left column, a) and emotional stress (right column, b) during pregnancy.

### **Supplemental Material References:**

Bland JM, Altman DG. 2002. Statistics notes: Validating scales and indexes. *BMJ* 324:606-607.

Danish National Board of Health. 1993. Classification of Diseases. 10th Revision. Copenhagen.

Kanner AD, Coyne JC, Schaefer C, Lazarus RS. 1981. Comparison of two modes of stress measurement: Daily hassles and uplifts versus major life events. *J Behav Med* 4:1-39.
